# Supplementary material for: A comparative study of microbial dynamics and phosphorus removal for a two side-stream wastewater treatment processes
Source: Royal Society of Chemistry journal article supplement (doi:10.1039/c7ra07610j), 2017-01-01
Supplement: c7ra07610j1.pdf [file c7ra07610j1.pdf]

## Supplementary Information:

### A Comparative Study of Microbial Dynamics and Phosphorus Removal for two Side-Stream Wastewater Treatment Processes

Yanyan Zhang<sup>a,b</sup>, Md. Shahinoor Islam<sup>a,c</sup>, Kerry N. McPhedran<sup>a,d</sup>, Shimiao Dong<sup>a</sup>, Ehab M. Rashed<sup>e</sup>, Maha M. El-Shafei<sup>f</sup>, Ahmed M. Noureldin<sup>f</sup>, and Mohamed Gamal El-Din<sup>a\*</sup>

<sup>a</sup>Department of Civil and Environmental Engineering, University of Alberta, Edmonton, Alberta, Canada

<sup>b</sup>Department of Civil Engineering, New Mexico State University, Las Cruces, New Mexico, USA

<sup>c</sup>Department of Chemical Engineering, Bangladesh University of Engineering & Technology, Dhaka, Bangladesh

<sup>d</sup>Department of Civil and Geological Engineering, College of Engineering, University of Saskatchewan, Saskatoon, Canada

<sup>e</sup>Sanitary & Environmental Engineering, Cairo University, Giza, Egypt

<sup>f</sup>Housing and Building National Research Center (HBRC), Cairo, Egypt

\*Corresponding authors: Tel: 780-492-5124; e-mail: mgamalel-din@ualberta.ca (M. Gamal El-Din)

**MiSeq.** The forward primer was constructed with the Illumina i5 adapter (5'-3') (AATGATACGGCGACCACCGAGATCTACAC), an 8–10 bp barcode, a primer pad (Forward: TATGGTAATT), and the 28F-GAGTTTGATCNTGGCTCAG primer. The reverse fusion primer was constructed with (5'-3') the Illumina i7 adapter (CAAGCAGAAGACGGCATAACGAGAT), an 8–10 bp barcode, a primer pad (Reverse: AGTCAGTCAG), and the reverse primer (388R-TGCTGCCTCCCGTAGGAGT). Reactions were performed on ABI Veriti thermocyclers (Applied Biosystems, Carlsbad, California, USA) under the following thermal profile: 95 °C for 5 min, then 35 cycles of 94 °C for 30 sec, 54 °C for 40 sec, 72 °C for 1 min, followed by one cycle of 72 °C for 10 min and 4°C hold. Amplification products were then pooled equimolar and each pool was size selected in two rounds using AgencourtAMPure XP (Beckman Coulter, Indianapolis, Indiana, USA) in a 0.7 ratio for both rounds. Size selected pools were then quantified using the Qubit 2.0 Fluorometer (Life Technologies) and loaded on an Illumina MiSeq (Illumina, Inc. San Diego, California, USA) 2 × 300 flow cell at 10 pM. After denoising (USEARCH application) and chimera removal (UCHIIME in de novo mode), the sequences were clustered into operational taxonomic units (OTU) clusters with 100% identity (0% divergence) using USEARCH for taxonomic identification.

**Table S1.** Characteristics of influent wastewaters at different stages of operation

| Major parameters<br>(mg/L) | Stage 1‡  |           | Stage 2†  | Stage 3†  |
|----------------------------|-----------|-----------|-----------|-----------|
|                            | Phase I   | Phase II  |           |           |
| COD (dissolved)            | 100-120   | 124-130   | 360-410   | 360-420   |
| Total P                    | 6.9-7.8   | 7.5-7.8   | 3.9-4.9   | 20.6-22.2 |
| Reactive P                 | 5.9-6.5   | 6.9-7.2   | 3.6-4.6   | 19.6-20.9 |
| NH <sub>3</sub> -N         | 45.4-50.1 | 31.2-35.4 | 22.1-26.4 | 22.2-23.6 |
| NO <sub>2</sub> -N         | <0.01     | <0.01     | <0.03     | <0.4      |
| NO <sub>3</sub> -N         | 0.5-1.0   | 0.5-1.0   | 1.0-2.0   | <1.0      |
| Alkalinity                 | 420       | 458       | 436       | 497       |
| pH (unitless)              | 6.85      | 6.71      | 6.86      | 4.97      |

‡Stage 1: The raw municipal wastewater in Goldbar wastewater treatment plant was used for the operation of two systems in Stage 1.

Phase I: The wastewater was collected before primary clarifier on March 08, 2015.

Phase II: The wastewater was collected before primary clarifier on May 12, 2015.

†Stage 1 & 2: Mixed wastewater was prepared after mixing of treated wastewater and raw wastewater collected from Goldbar plant. Sodium acetate was added to increase the COD of simulated wastewater.

**Table S2.** Volumetric flow rate in each reactor for Modified and Denitrifying EBPR processes

|                           | Modified             |          | Denitrifying         |          |
|---------------------------|----------------------|----------|----------------------|----------|
|                           | Flow rate,<br>mL/min | Recycle% | Flow rate,<br>mL/min | Recycle% |
| Feed/influent             | 4                    | -        | 4                    | -        |
| Internal return to anoxic | -                    | -        | 12                   | 300      |
| Sludge to anaerobic tank  | 2.1                  | -        | 2.1                  | -        |
| Return anaerobic sludge   | 1.4                  | 35       | 1.4                  | 35       |
| Effluent                  | 3.4                  | -        | 3.4                  | -        |
| Conc. P effluent          | 0.6                  | -        | 0.6                  | -        |

**Table S3.** Target genes and primers for qPCR analyses of total bacteria and the different clades from *Accumulibacter ppk1* gene <sup>1</sup>

| <b>Primer</b>                   | <b>Sequence (5'-3')</b>                                 | <b>Target</b>               | <b>Annealing temperature (°C)</b> |
|---------------------------------|---------------------------------------------------------|-----------------------------|-----------------------------------|
| 341f<br>534r                    | CCTACGGGAGGCAGCAG<br>ATTACCGCGGCTGCTGG                  | Bacterial 16S<br>rRNA genes | 60                                |
| Acc-ppk1-763f<br>Acc-ppk1-1170r | GACGAAGAAGCGGTCAAG<br>AACGGTCATCTTGATGGC                | Acc-I ppk 1                 | 61                                |
| Acc-ppk1-893f<br>Acc-ppk1-997r  | AGTTCAATCTCACCGAGAGC<br>GGAACTTCAGGTCGTTGC              | Acc-IIA ppk 1               | 61                                |
| Acc-ppk1-870f<br>Acc-ppk1-1002r | GATGACCCAGTTCCTGCTCG<br>CGGCACGAACTTCAGATCG             | Acc-IIB ppk1                | 61                                |
| Acc-ppk1-254f<br>Acc-ppk1-460r  | TCACCACCGACGGCAAGAC<br>CCGGCATGACTTCGCGGAA<br>G         | Acc-IIC ppk1                | 66                                |
| Acc-ppk1-375f<br>Acc-ppk1-522r  | GGGTATCCGTTTCCTCAAGC<br>G<br>GAGGCTCTTGTTGAGTACAC<br>GC | Acc-IID ppk1                | 63                                |
| Acc-ppk1-355f<br>Acc-ppk1-600r  | CGAACTCGGCGAAAGCGAG<br>TA<br>ATCGCCTCCGAGCAACTGTT<br>C  | Acc-IIF ppk1                | 70                                |

**Table S4.** Target genes and primers for qPCR analyses of nitrifiers and denitrifiers

| Function        | Target gene                      | Primer                    | Sequence                      | Reference |
|-----------------|----------------------------------|---------------------------|-------------------------------|-----------|
| Nitrification   | AOB                              | amoA-1F                   | GGGGTTTCTACTGGTGGT            | 2         |
|                 | <i>amoA</i>                      | amoA-2R                   | CCCCTCKGSAAAGCCTTCTTC         |           |
|                 | <i>Nitrospira</i> spp. 16S rDNA  | NSR 1113f                 | CCTGCTTTCAGTTGCTACCG          |           |
|                 |                                  | NSR 1264r                 | GTTTGCAGCGCTTTGTACCG          |           |
|                 | <i>Nitrobacter</i> spp. 16S rDNA | Nitro 1198f               | ACCCCTAGCAAATCTCAAAA<br>AACCG |           |
| Denitrification | <i>narG</i> gene                 | narG 1960                 | TAYGTSGGGCAGGARAAACT          | 3         |
|                 |                                  | m2f                       | G                             |           |
|                 |                                  | narG 2050                 | CGTAGAAGAAGCTGGTGCTG          |           |
|                 | m2r                              | TT                        |                               |           |
|                 | <i>nirS</i> gene                 | nirS 1f                   | TACCACCCSGARCCGCGCGT          |           |
|                 |                                  | nirS 3r                   | GCCGCCGTCRTGVAGGAA            |           |
|                 | <i>nirK</i> gene                 | nirK 876                  | ATYGGCGGVCA YGGCGA            |           |
|                 |                                  | nirK 1040                 | GCCTCGATCAGRTRRTGGTT          |           |
|                 | <i>nosZ</i> gene                 | nosZ 2f                   | CGCRACGGCAASAAGGTSMS<br>GT    |           |
| nosZ 2r         |                                  | CAKRTGCAKSGCRTGGCAGA<br>A |                               |           |

**Table S5.** qPCR amplification programs for total, nitrifying and denitrifying bacteria

| Target gene                      | Initial denaturation           | Cycles |              |              |                   | Final extension (72 °C) |
|----------------------------------|--------------------------------|--------|--------------|--------------|-------------------|-------------------------|
|                                  |                                | Cycles | Denaturation | Annealing    | Extension (72 °C) |                         |
| <i>AOB amoA</i>                  | 95 °C, 15 min                  | 45     | 95 °C, 1 min | 54 °C, 1 min | 1 min             | 10 min                  |
| <i>Nitrospira</i> spp. 16S rDNA  | 50 °C, 2 min;<br>95 °C, 10 min | 50     | 95 °C, 30 s  | 60 °C, 60 s  | -                 | -                       |
| <i>Nitrobacter</i> spp. 16S rDNA | 50 °C, 2 min;<br>95 °C, 10 min | 50     | 94 °C, 20 s  | 58 °C, 60 s  | 40 s              | -                       |
| <i>narG</i> gene                 | 95 °C, 30 s                    | 35     | 95 °C, 15 s  | 58 °C, 30 s  | 31 s              | -                       |
| <i>nirS</i> gene                 | 95 °C, 30 s                    | 30     | 95 °C, 15 s  | 60 °C, 20 s  | 31 s              | -                       |
| <i>nirK</i> gene                 | 95 °C, 30 s                    | 30     | 95 °C, 15 s  | 58 °C, 30 s  | 31 s              | -                       |
| <i>nosZ</i> gene                 | 95 °C, 30 s                    | 30     | 95 °C, 15 s  | 60 °C, 30 s  | 31 s              | -                       |

**Table S6.** Steady-state nutrient concentrations (mg/L) in influent and effluent streams for the conventional and denitrifying EBPRs.

| Stages              | Time         | COD      |              |            | NH <sub>4</sub> <sup>+</sup> -N |            |            | Total P (phosphorus) |            |           |            |
|---------------------|--------------|----------|--------------|------------|---------------------------------|------------|------------|----------------------|------------|-----------|------------|
|                     | d            | influent | effluent     | % removal  | influent                        | effluent   | % removal  | influent             | effluent   | % removal |            |
| <b>Modified</b>     | <b>1, I</b>  | 0-56     | 113.4 ± 5.2  | 67.6 ± 9.6 | 86.9 ± 1.9                      | 46.3 ± 2.4 | 23.4 ± 7.3 | 47.4 ± 7.8           | 7.3 ± 0.2  | 4.8 ± 0.5 | 35.2 ± 3.4 |
|                     | <b>1, II</b> | 57-80    | 129.2 ± 2.9  | 56.9 ± 6.6 | 89.7 ± 2.2                      | 33.6 ± 0.8 | 5.8 ± 1.2  | 83.4 ± 3.2           | 7.2 ± 1.6  | 3.0 ± 0.0 | 57.4 ± 3.6 |
|                     | <b>2</b>     | 81-100   | 377.2 ± 17.7 | 62.7 ± 4.6 | 91.9 ± 0.5                      | 24.9 ± 1.7 | 0.1 ± 0.1  | 99.5 ± 0.4           | 4.2 ± 0.3  | 1.3 ± 0.1 | 68.4 ± 0.9 |
|                     | <b>3</b>     | 100-120  | 396.2 ± 10.3 | 61.3 ± 9.3 | 92.3 ± 1.1                      | 22.2 ± 0.7 | 0.2 ± 0.3  | 99.0 ± 1.1           | 20.7 ± 0.3 | 9.0 ± 0.8 | 56.7 ± 4.4 |
| <b>Denitrifying</b> | <b>1, I</b>  | 0-56     | 113.4 ± 5.2  | 62.8 ± 7.3 | 88.2 ± 1.4                      | 46.3 ± 2.4 | 1.3 ± 2.1  | 96.1 ± 4.9           | 7.3 ± 0.2  | 2.4 ± 0.3 | 69.2 ± 2.8 |
|                     | <b>1, II</b> | 57-80    | 129.2 ± 2.9  | 51.2 ± 5.8 | 90.2 ± 1.1                      | 33.6 ± 0.8 | 0.3 ± 0.2  | 99.1 ± 0.7           | 7.2 ± 1.6  | 1.8 ± 0.2 | 75.0 ± 1.2 |
|                     | <b>2</b>     | 81-100   | 377.2 ± 17.7 | 58.3 ± 5.1 | 92.6 ± 0.9                      | 24.9 ± 1.7 | 0.1 ± 0.1  | 99.7 ± 0.3           | 4.2 ± 0.3  | 1.0 ± 0.3 | 78.6 ± 3.3 |
|                     | <b>3</b>     | 100-120  | 396.2 ± 10.3 | 49.3 ± 7.9 | 93.9 ± 0.9                      | 22.2 ± 0.7 | 0.1 ± 0.3  | 99.3 ± 0.9           | 20.7 ± 0.3 | 6.7 ± 0.9 | 67.9 ± 2.1 |

Note: The COD removal was calculated based on the following equation:

$$\text{Removal} = 1 - (\text{effluent COD}) / (\text{influent COD} + \text{NaOAc COD entering anaerobic reactor})$$



**Table S7.** Abundance (%) of nitrifiers and denitrifiers in terms of OTUs in the modified and denitrifying EBPRs

|                     | Stage                | AOB         |                   | NOB                |             | Denitrifiers |             |             |       |
|---------------------|----------------------|-------------|-------------------|--------------------|-------------|--------------|-------------|-------------|-------|
|                     |                      | <i>amoA</i> | <i>Nitrospira</i> | <i>Nitrobacter</i> | <i>nirK</i> | <i>nirS</i>  | <i>narG</i> | <i>nosZ</i> |       |
| <b>Modified</b>     | <b>Contact</b>       | 1           | 0.11              | 0.02               | 1.69        | 6.42         | 4.16        | 0.31        | 13.45 |
|                     |                      | 2           | 0.06              | 0.01               | 1.55        | 5.19         | 1.56        | 0.64        | 20.36 |
|                     |                      | 3           | 0.13              | 0.02               | 1.94        | 6.89         | 2.18        | 1.24        | 35.53 |
|                     | <b>Stabilization</b> | 1           | 0.20              | 0.02               | 1.90        | 7.18         | 4.52        | 0.31        | 13.79 |
|                     |                      | 2           | 0.07              | 0.01               | 1.95        | 5.92         | 2.69        | 0.84        | 31.18 |
|                     |                      | 3           | 0.13              | 0.02               | 1.94        | 6.39         | 2.20        | 1.12        | 33.34 |
|                     | <b>Anaerobic</b>     | 1           | 0.09              | 0.01               | 1.14        | 4.71         | 2.65        | 0.18        | 9.05  |
|                     |                      | 2           | 0.09              | 0.02               | 2.10        | 6.75         | 3.01        | 0.72        | 23.09 |
|                     |                      | 3           | 0.12              | 0.02               | 1.96        | 6.88         | 2.33        | 1.03        | 30.23 |
| <b>Denitrifying</b> | <b>Aerobic</b>       | 1           | 0.09              | 0.01               | 2.14        | 8.18         | 3.65        | 0.49        | 17.40 |
|                     |                      | 2           | 0.14              | 0.01               | 2.05        | 9.17         | 3.98        | 0.73        | 27.03 |
|                     |                      | 3           | 0.15              | 0.02               | 2.39        | 7.72         | 2.65        | 0.89        | 33.15 |
|                     | <b>Anoxic</b>        | 1           | 0.08              | 0.01               | 1.86        | 5.78         | 2.52        | 0.36        | 12.41 |
|                     |                      | 2           | 0.12              | 0.01               | 1.85        | 6.88         | 2.81        | 0.51        | 22.63 |
|                     |                      | 3           | 0.18              | 0.02               | 2.60        | 8.83         | 2.95        | 1.11        | 36.29 |
|                     | <b>Anaerobic</b>     | 1           | 0.14              | 0.01               | 3.16        | 11.85        | 4.41        | 0.58        | 18.33 |
|                     |                      | 2           | 0.09              | 0.01               | 1.51        | 6.01         | 2.72        | 0.42        | 20.70 |
|                     |                      | 3           | 0.15              | 0.01               | 2.35        | 7.47         | 2.97        | 0.97        | 27.19 |

**Table S8.** Abundance (%) of *Dechloromonas* related PAOs in terms of OTUs in different reactors of the modified and denitrifying EBPRs

|                                    | Stage | Modified |               |           | Denitrifying |         |           |
|------------------------------------|-------|----------|---------------|-----------|--------------|---------|-----------|
|                                    |       | Contact  | Stabilization | Anaerobic | Anoxic       | Aerobic | Anaerobic |
| <i>Dechloromonas denitrificans</i> | 1     | 0.495    | 0.361         | 0.425     | 0.433        | 0.424   | 0.593     |
|                                    | 2     | 0.028    | 0.118         | 0.000     | 0.045        | 0.259   | 0.231     |
|                                    | 3     | 0.006    | 0.090         | 0.129     | 0.341        | 0.472   | 0.326     |
| <i>Dechloromonas sp.</i>           | 1     | 6.254    | 4.684         | 6.406     | 6.594        | 5.797   | 7.509     |
|                                    | 2     | 0.634    | 2.304         | 2.199     | 2.728        | 4.395   | 5.429     |
|                                    | 3     | 1.677    | 2.668         | 3.591     | 1.349        | 3.331   | 1.611     |

## References

1. S. He, D. L. Gall and K. D. McMahon, *Journal*, 2007, **73**, 5865-5874
2. T. J. Mincer, M. J. Church, L. T. Taylor, C. Preston, D. M. Karl and E. F. DeLong, *Environmental microbiology*, 2007, **9**, 1162-1175.
3. Y. M. Kim, D. S. Lee, C. Park, D. Park and J. M. Park, *Water research*, 2011, **45**, 1267-1279.
